# Supplementary material
Source: MDPI journal article supplement (https://www.mdpi.com/2073-4352/13/12/1678)
Supplement: s1 [file s1]

## Supplementary Materials

# Lead-Free Organic Manganese (II) Bromide Hybrid with Highly Efficient and Stable Green Emission for UV Photodetection

Ye Tian <sup>1</sup>, Qilin Wei <sup>2,\*</sup>, Lian Duan <sup>3</sup> and Chengyu Peng <sup>3,\*</sup>

<sup>1</sup> School of Semiconductors and Physics, North University of China, Taiyuan 030051, China

<sup>2</sup> School of Chemistry and Chemical Engineering, Shandong University, Jinan 250100, China

<sup>3</sup> Traffic Information Engineering Institute, Guangxi Transport Vocational and Technical College, Nanning 530004, China

\* Correspondence: qlwei@sdu.edu.cn (Q.W.); chengyu\_peng@126.com (C.P.)

## Experimental section

### Materials, single crystal growth, and photodetector fabrication

Tetrabutylammonium bromide (TBABr, 99%), and Manganese (II) bromide tetrahydrate ( $\text{MnBr}_2 \cdot 4\text{H}_2\text{O}$ , 98 %) were purchased from Macklin, anhydrous ethanol (AR) was purchased from Guangdong Guanghua, and toluene (AR) was purchased from Chengdu Kelong.

Typically, 2 mmol TBABr and 1 mmol  $\text{MnBr}_2 \cdot 4\text{H}_2\text{O}$  were fully dissolved in 2 mL anhydrous ethanol. Then, slowly add 3 mL toluene to the clear precursor solution. After 24 - 72 h, the green bulk single crystals can be obtained from the solution.

For preparing  $\text{Ag}/(\text{TBA})_2\text{MnBr}_4/\text{Ag}$  photodetector, a thin layer of silver paste on the surface of  $(\text{TBA})_2\text{MnBr}_4$  single crystal, is then transferred to the oven to bake at 60 °C overnight. The distance of Ag electrodes was controlled to 5 mm. The detector uses 365 nm continuous laser as the excitation source. The distance between the light source and the detector is about 10 cm and the light source frequency is  $8.22 \times 10^{14}$  Hz.

### Characterization

A SMARTLAB 3KW X-ray diffractometer with Cu  $K\alpha$  radiation ( $\lambda = 1.54059 \text{ \AA}$ ) was used

to collect the powder X-ray diffraction data in the  $2\theta$  range of  $5^\circ$ - $50^\circ$ . The scanning electron microscopy (SEM, Hitachi SU8020) was used to observe the morphology. The energy-dispersive spectrometry (EDS, Oxford X-Max Aztec) was used to collect the element composition and distribution. The Raman spectrum was characterized by WITec alpha300R Raman fluorescence spectrometer with a 633 nm laser as an excitation source. The photoluminescence (PL), PL excitation (PLE) spectrum, time-resolved photoluminescence (TRPL), photoluminescence quantum yields (PLQYs), temperature-dependent PL spectra, PLQY stability, and UV stability obtained on the Horiba Jobin Yvon Fluorolog-3 spectrometer and Zolix SFQY-9000 spectrometer. The Lambda 750 ultraviolet-visible spectrophotometer was used to measure the absorption spectrum. The thermal analysis was carried out on a Shimadzu DTG - 60H instrument. The photoelectric properties of the as-fabricated LED device, including the emission spectra, correlated color temperature (CCT), and Commission Internationale de L'Eclairage (CIE) chromaticity coordinate were obtained on an ATA-1000 (Everfine, China) optoelectronic analyzer. A Keithley 2400 sourcemeter was used to collect the I-V curves of the  $\text{Ag}/(\text{TBA})_2\text{MnBr}_4/\text{Ag}$  device.

### **Computational Details**

The projector-augmented wave method is used to calculate the band structure, as implemented in the Vienna Ab initio simulation package (VASP). The generalized gradient approximation of the Perdew-burke-Ernzerhof parameterization is used for the exchange and correlation functional. The kinetic energy cutoff of 500 eV and a  $4\times 4\times 4$  Monkhorst-Pack k-mesh for the wavefunction basis set is used. The energy convergence criterion is set as  $1.0\times 10^{-6}$  eV for structure relaxations.

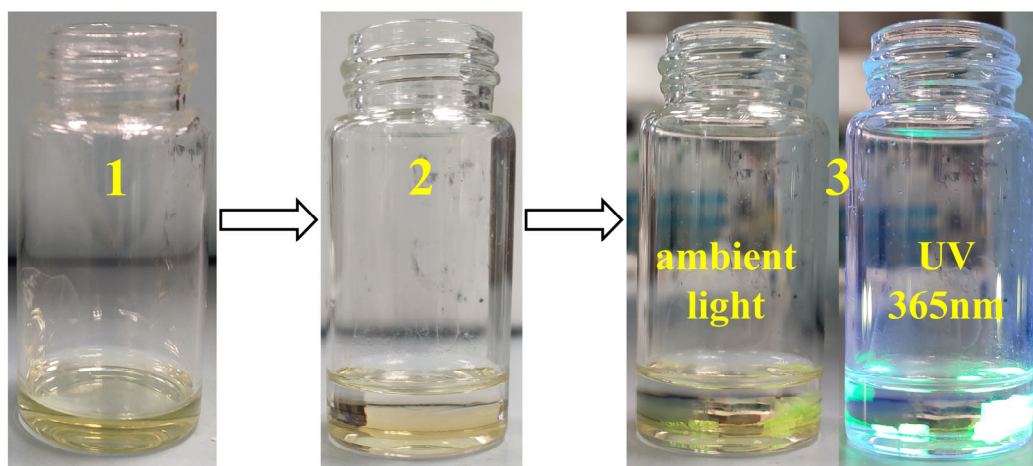

**Figure S1.** The photograph of the growth process of (TBA)<sub>2</sub>MnBr<sub>4</sub> SCs.

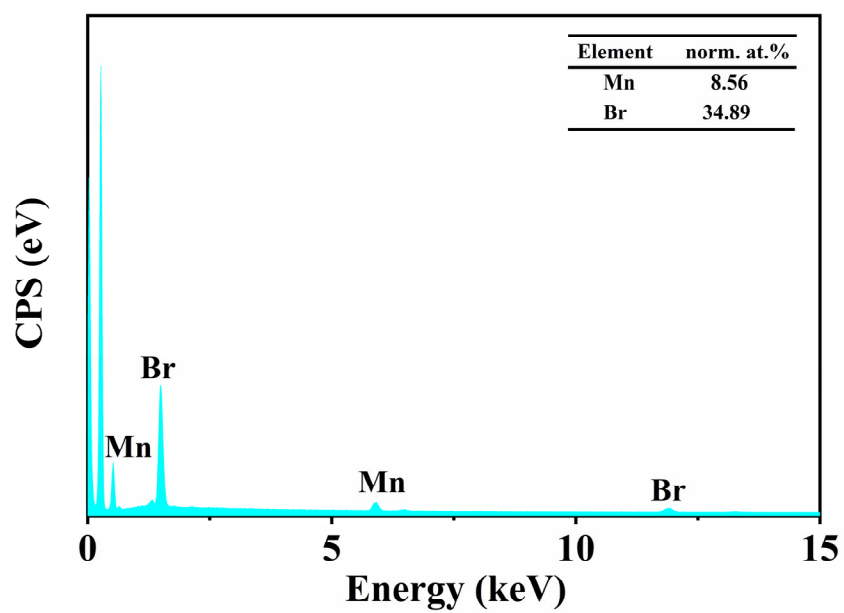

**Figure S2.** The Energy disperse spectrum of  $(\text{TBA})_2\text{MnBr}_4$ .

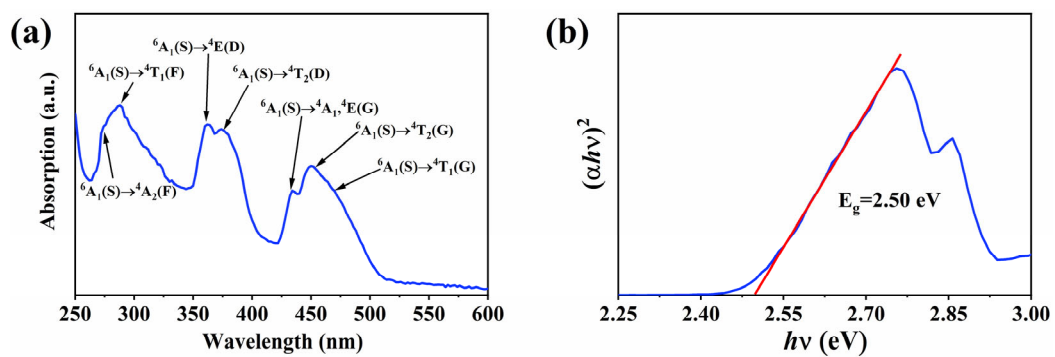

**Figure S3.** The UV-Vis absorption spectrum (a) of  $(TBA)_2MnBr_4$  and corresponding Tauc plot (b).

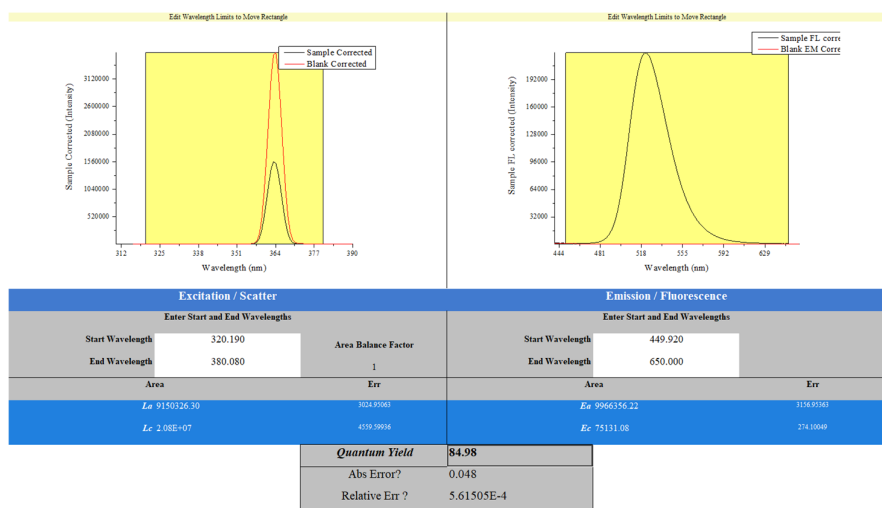

**Figure S4.** The PLQY measurement view of  $(\text{TBA})_2\text{MnBr}_4$  shows that the PLQY is as high as 84.98%. The excitation wavelength was 365 nm.

**Table S1.** Assignments of the observed Raman spectra of (TBA)<sub>2</sub>MnBr<sub>4</sub> SCs.

| Raman Wavenumber (cm <sup>-1</sup> ) | Peak Assignment                       |
|--------------------------------------|---------------------------------------|
| 80.43                                | $\delta[\text{MnBr}_4]^{2-}$          |
| 152.89                               | $\nu^s[\text{MnBr}_4]^{2-}$           |
| 253.59                               | $\nu^{\text{as}}[\text{MnBr}_4]^{2-}$ |
| 398.51                               | -                                     |
| 654.56                               | -                                     |
| 859.35                               | $\rho\text{CH}_2$                     |
| 906.96                               | $\nu(\text{C-N})$                     |
| 1052.46                              | C-C                                   |
| 1124.93                              | -                                     |
| 1322.63                              | $\tau\text{CH}_2$                     |
| 1398.16                              | $\delta^s\text{CH}_3$                 |
| 1439.91                              | $\delta^{\text{as}}\text{NH}_3$       |
| 1464.47                              | $\delta\text{CH}_2$                   |
| 1675.09                              | -                                     |
| 2865.09                              | $\nu^s\text{CH}_2$                    |
| 2934.47                              | $\nu^{\text{as}}\text{CH}_2$          |

Where  $\nu$  is stretching mode,  $\delta$  is scissoring or bending mode,  $\rho$  is rocking mode, as is asymmetric mode, s is symmetric mode.

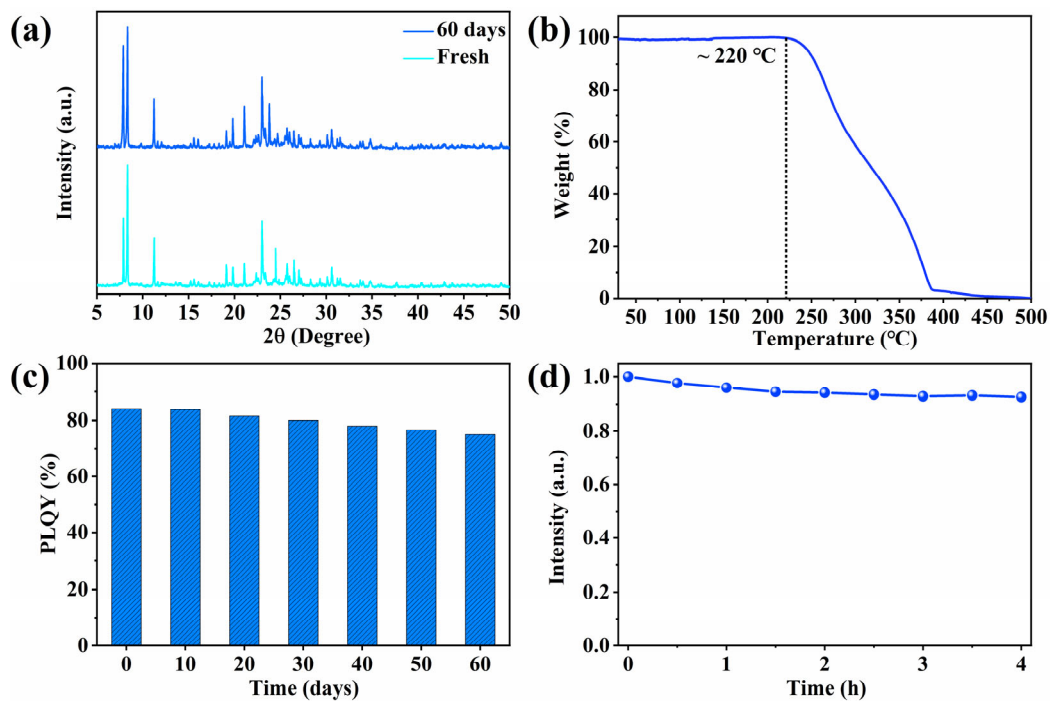

**Figure S5.** (a) The XRD patterns of (TBA)<sub>2</sub>MnBr<sub>4</sub> before and after stored in ambient condition for 60 days. (b) TGA curve of (TBA)<sub>2</sub>MnBr<sub>4</sub>. (c) The PLQY value variation of (TBA)<sub>2</sub>MnBr<sub>4</sub>. (d) Long-term PL stability of (TBA)<sub>2</sub>MnBr<sub>4</sub> under a 365 nm UV lamp within 4 h.



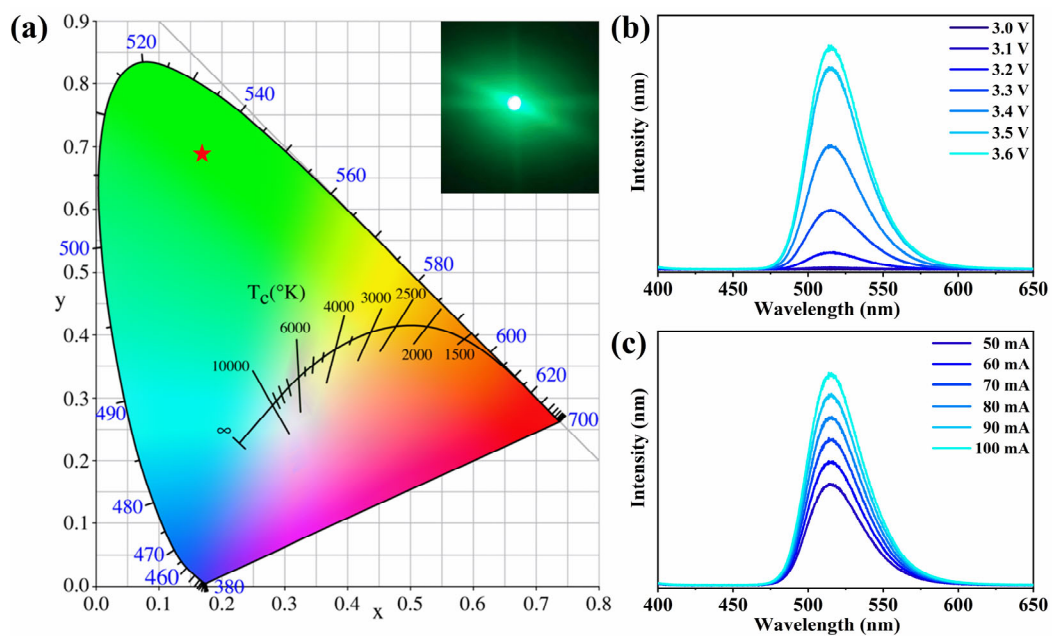

**Figure S6.** (a) The CIE coordinates of the fabricated LED. Emission spectra of the fabricated LED at different driving voltage (b) and currents (c).

**Table S2.** The main optoelectronic application directions of typical Mn(II)-based metal halides.

| Compound                                                                                                                                                                                         | Emission Wavelength | PLQY       | Optoelectronic Application | Ref  |
|--------------------------------------------------------------------------------------------------------------------------------------------------------------------------------------------------|---------------------|------------|----------------------------|------|
| (HTPP) <sub>2</sub> MnBr <sub>4</sub>                                                                                                                                                            | 519 nm              | 98.6%      | X-ray scintillator         | [57] |
| (MTP) <sub>2</sub> MnBr <sub>4</sub>                                                                                                                                                             | 516 nm              | 99.5%      | X-ray scintillator         | [58] |
| BTP <sub>2</sub> MnBr <sub>4</sub>                                                                                                                                                               | 510 nm              | 91%        | X-ray scintillator         | [59] |
| (ETP) <sub>2</sub> MnBr <sub>4</sub>                                                                                                                                                             | 520 nm              | 84%        | X-ray scintillator         | [60] |
| (C <sub>5</sub> H <sub>6</sub> N) <sub>2</sub> MnBr <sub>4</sub>                                                                                                                                 | 520 nm              | 59.36%     | X-ray scintillator         | [61] |
| Cs <sub>3</sub> MnI <sub>5</sub>                                                                                                                                                                 | 540 nm              | 73%        | X-ray scintillator         | [62] |
| [(H <sub>2</sub> C=CHCH <sub>2</sub> )(C <sub>6</sub> H <sub>5</sub> ) <sub>3</sub> P] <sub>2</sub> MnBr <sub>4</sub>                                                                            | 516 nm              | 48%        | LED                        | [19] |
| (Ph <sub>4</sub> P) <sub>2</sub> MnBr <sub>4</sub>                                                                                                                                               | 516 nm              | 98%        | LED                        | [28] |
| [Ph <sub>3</sub> BzP] <sub>2</sub> [MnBr <sub>4</sub> ]                                                                                                                                          | 517 nm              | 53%        | LED                        | [63] |
| (C <sub>9</sub> NH <sub>20</sub> ) <sub>2</sub> MnBr <sub>4</sub>                                                                                                                                | 528 nm              | 81.08%     | Acetone sensor             | [21] |
| (TPA) <sub>2</sub> MnBr <sub>4</sub>                                                                                                                                                             | 512 nm              | 89.23%     | Ferbam sensor              | [21] |
| ((CH <sub>3</sub> ) <sub>4</sub> N)((C <sub>2</sub> H <sub>5</sub> ) <sub>4</sub> N) <sub>2</sub> (M <sub>n</sub> Br <sub>4-x</sub> Cl <sub>x</sub> ) <sub>2</sub> NH <sub>4</sub> (x = 0, 2, 3) | x = 0, 510 nm       | x = 0, 95% | Photodetector              | [40] |
|                                                                                                                                                                                                  | x = 2, 512 nm       | x = 2, 97% |                            |      |
|                                                                                                                                                                                                  | x = 3, 513 nm       | x = 3, 99% |                            |      |
